# Supplementary material for: Investigating the histological and structural properties of tendon gel as an artificial biomaterial using the film model method in rabbits
Source: Research Square preprint supplement (doi:10.21203/rs.3.rs-484106/v1), 2021-05-06
Supplement: Supplementary file 1 [file 0f4573f9ab6940ed5d585dbe.docx]

**Supplementary Figure legend**

**Supplementary Fig S1.** Results of the multiple comparison tests concerning the histological assessment before the tensile process.

**Supplementary Fig S2.** Results of surface analysis for evaluating thicknesses of the collagen fibers after the tensile process.

**Supplementary Fig S3.** Tensile process for tendon gel. (a) Tensile process unit. (b) Tendon gel after the tensile process (white arrow)
